# Supplementary material
Source: PubMed Central journal article supplement (PMC2916424)
Supplement: supp_192_16_4192__1.pdf [file supp_192_16_4192__1.pdf]

1 **Supplemental Material**

2

3

TABLE S1. Oligonucleotides used in this study.

| Primer            | Nucleotide sequence (5'-3') <sup>a</sup> |
|-------------------|------------------------------------------|
| mgr1314fwRT       | ATGGTTTCGCGTATTGAACAGC                   |
| mgr1314revRT      | CTATTTGTCGTCGGAATCACCG                   |
| mgr1314up_fw      | <u>CAATTGCGCATGACCGAATTCGCCCG</u>        |
| mgr1314up_rev     | <u>GCGGCCGCAATACGCGAAACCATGGC</u>        |
| mgr1314do_fw      | <u>ACCGGTTTGATTCCGACGACAAATAG</u>        |
| mgr1314do_rev     | <u>ACCGGTCCAGTTCGGAAAATACCTTC</u>        |
| mgr1314fw         | <u>GAGCTCAAGACCGCTTACAACATG</u>          |
| mgr1314rev        | <u>GAGCTCCTATTTGTCGTCGGAATCAC</u>        |
| mgr1314_del_fw    | CAATTACGCCGCGCATCG                       |
| mgr1314_del_rev   | AGCCGCCTCGACCTCGTT                       |
| mgr1314_probe_fw  | TCGCCCCCAATTACGCCGCG                     |
| mgr1314_probe_rev | CGCTCGGCGCCTCTTCATAGCGG                  |
| PfhuFfw           | <u>GGGCCCCGATTTTCATCTCTTTCATT</u>        |
| PfhuFrev          | <u>CCATGGTTCGGGATAGTAATCTAAATGATAAT</u>  |
| Pmms16fw          | <u>CTCGAGGAGCCTCTCCATTAACAATG</u>        |
| Pmms16rev         | <u>CATATGCTTGAATTCCTCCAACCGGGGGTATG</u>  |
| PrplKfw           | <u>AAGCTTGGCATCAAGGTTTCGGAAG</u>         |
| PrplKrev          | <u>CATATGTTTACCCTACCTCTGGTCC</u>         |
| Pmgr4079fw        | <u>CATATGCTGGCCCTCACCCGCTGA</u>          |
| Pmgr4079rev       | <u>CTCGAGGCCGCCAGCTTCTGTCCT</u>          |
| PmamDCrev         | <u>CATATGCTGATCTCCGGCAAGTGTATG</u>       |
| PmamDCfw          | <u>CTCGAGCAATGACCACCACCTTA AAC</u>       |
| PmamABfw          | <u>CTCGAGATGGCGCAAAGATGTGACGT C</u>      |
| PmamABrev         | <u>CATATGTCCCGTCACAATTCACCTCC</u>        |
| amb1009fw         | <u>CATATGATTTCTCGAATCGAACAACG</u>        |
| amb1009rev        | <u>GAGCTCTCAGTCGGCGGTTTCGTC</u>          |
| amb4460fw         | <u>CATATGATTTACGCATCGAGCAAC</u>          |
| amb4460rev        | <u>GAGCTCCTATTTCTCTTCCGGTTTATCA</u>      |
| Ecfurfw           | <u>CATATGACTGATAACAATACCGCC</u>          |
| Ecfurrev          | <u>GAGCTCTTATTTGCCTTCGTGCGC</u>          |

4

<sup>a</sup> Underlining indicates restriction site used for cloning purposes

5

5 TABLE S2. Identified Fur-like proteins of *M. gryphiswaldense* and similarity (%) to  
6 homologues. Locus tags refer to *M. magneticum* AMB-1 (Amb prefix), *M. magnetotacticum*  
7 MS-1 (Magn prefix), *Magnetococcus* sp. MC-1 (Mmc1 prefix), *Desulfovibrio magneticus*  
8 RS-1 (DMR prefix) and to an uncultured MTB (fos002\_0290).

| Protein | Similarity to <i>EcFur</i> | Best hit outside MTB                                       |           | Similarity to MTB homologues |            |
|---------|----------------------------|------------------------------------------------------------|-----------|------------------------------|------------|
|         |                            | Locus tag / organism / similarity                          |           | Locus tag                    | Similarity |
| Mgr1314 | 50%                        | Rru_A3767 / <i>Rhodospirillum rubrum</i> ATCC 11170 / 80 % |           | Amb4460                      | 91%        |
|         |                            |                                                            |           | Amb1009                      | 86%        |
|         |                            |                                                            |           | Magn03009848                 | 91%        |
|         |                            |                                                            |           | Magn03007092                 | 86 %       |
|         |                            |                                                            |           | fos002_0290                  | 64%        |
|         |                            |                                                            |           | Mmc1_0894                    | 44%        |
|         |                            |                                                            |           | DMR_43000                    | 47%        |
|         |                            |                                                            |           | DMR_04370                    | 43%        |
|         |                            |                                                            | DMR_19790 | 41%                          |            |
| Mgr1305 | 33%                        | <i>rpsP</i> / alpha proteobacterium BAL199 / 52 %          |           | -                            | -          |
| Mgr1399 | 37%                        | RC1_2944 / <i>Rhodospirillum centenum</i> SW / 76 %        |           | Amb4306                      | 89 %       |
|         |                            |                                                            |           | Magn03009205                 | 90%        |
| Mgr3480 | 34%                        | Atu0153 / <i>Agrobacterium tumefaciens</i> str. C58 / 65 % |           | Amb1662                      | 62%        |
| Mgr3335 | 30%                        | MELB17_01720 / <i>Marinobacter</i> sp. ELB17 / 59 %        |           | Amb2309                      | 75%        |
|         |                            |                                                            |           | Magn03007851                 | 68%        |
|         |                            |                                                            |           | Mmc1_3182                    | 50%        |
|         |                            |                                                            |           | DMR_26810                    | 33%        |

9

9 TABLE S3. Similarity (%) between *E. coli*, *M. gryphiswaldense* (locus tags with Mgr prefix) and *M. magneticum* (locus tags with Amb prefix) Fur  
 10 and Fur-like proteins. Numbers in brackets indicate similarity to the Fur domain of Amb4306.

| No. | Locus tag    | % similarity   |                |                |                |                |                |                |                |                |                |      |     |  |
|-----|--------------|----------------|----------------|----------------|----------------|----------------|----------------|----------------|----------------|----------------|----------------|------|-----|--|
|     |              | 1              | 2              | 3              | 4              | 5              | 6              | 7              | 8              | 9              | 10             | 11   | 12  |  |
| 1   | <i>EcFur</i> | 100            |                |                |                |                |                |                |                |                |                |      |     |  |
| 2   | Mgr1314      | 49.7           | 100            |                |                |                |                |                |                |                |                |      |     |  |
| 3   | Mgr1305      | 33.3           | 28.4           | 100            |                |                |                |                |                |                |                |      |     |  |
| 4   | Mgr1399      | 37.2           | 37.1           | 53.1           | 100            |                |                |                |                |                |                |      |     |  |
| 5   | Mgr3480      | 34.2           | 34.7           | 66.9           | 63.8           | 100            |                |                |                |                |                |      |     |  |
| 6   | Mgr3335      | 29.5           | 33.1           | 26.3           | 23.1           | 24.5           | 100            |                |                |                |                |      |     |  |
| 7   | Amb1009      | 52.3           | 86             | 33.3           | 38.9           | 37.1           | 31.6           | 100            |                |                |                |      |     |  |
| 8   | Amb4460      | 51.7           | 90.9           | 30.4           | 34.4           | 38.9           | 38.9           | 87.4           | 100            |                |                |      |     |  |
| 9   | Amb1662      | 36.2           | 35.4           | 55.4           | 52.4           | 61.6           | 32.7           | 38.6           | 37.2           | 100            |                |      |     |  |
| 10  | Amb4306      | 19.9<br>(39.9) | 19.5<br>(38.9) | 26.9<br>(51.4) | 47.6<br>(88.5) | 32.5<br>(67.2) | 13.1<br>(24.4) | 19.6<br>(40.1) | 17.1<br>(38.2) | 26.2<br>(51.8) | 100<br>(47.6)  |      |     |  |
| 11  | Amb2309      | 35.5           | 29.4           | 26.7           | 27.3           | 28             | 75.2           | 30             | 30.6           | 32.1           | 11.6<br>(25.5) | 100  |     |  |
| 12  | <i>EcZur</i> |                |                |                |                |                | 37.4           |                |                |                |                | 39.1 | 100 |  |

11

TABLE S4. Expression levels of MAI proteins identified by LC-MS/MS

| Locus tag | Protein identification                   | Molecular Weight | no. of TMDs<br>TMHMM /<br>Sosui | No. of peptide ions |      |      |      | Relative expression level in RU-1 |                      |
|-----------|------------------------------------------|------------------|---------------------------------|---------------------|------|------|------|-----------------------------------|----------------------|
|           |                                          |                  |                                 | WT                  |      | RU-1 |      | RU-1 -Fe /<br>WT -Fe              | RU-1 +Fe /<br>WT +Fe |
|           |                                          |                  |                                 | -Fe                 | +Fe  | -Fe  | +Fe  |                                   |                      |
| MGR4022   | TPR-like protein                         | 50 kDa           | 0                               | 10                  | n.d. | 11   | 11   | 1.10                              | unique               |
| MGR4041   | conserved hypothetical protein           | 9 kDa            | 0                               | n.d.                | n.d. | 11   | n.d. | unique                            | n.d.                 |
| MGR4072   | MmsF                                     | 14 kDa           | 3 / 2                           | 17                  | 15   | 12   | 13   | -1.42                             | -1.15                |
| MGR4073   | Mms6                                     | 13 kDa           | 1                               | 17                  | 56   | 11   | 24   | -1.55                             | -2.33                |
| MGR4076   | MamF                                     | 12 kDa           | 3                               | 16                  | 14   | 15   | 15   | -1.07                             | 1.07                 |
| MGR4077   | MamD                                     | 30 kDa           | 1 / 0                           | 37                  | 19   | 31   | 19   | -1.19                             | 1.00                 |
| MGR4078   | MamC                                     | 12 kDa           | 2                               | 170                 | 188  | 224  | 174  | 1.32                              | -1.08                |
| MGR4091   | MamE                                     | 78 kDa           | 1                               | 75                  | 51   | 82   | 52   | 1.09                              | 1.02                 |
| MGR4092   | MamJ                                     | 44 kDa           | 0                               | 19                  | 18   | 17   | 18   | -1.12                             | 1.00                 |
| MGR4093   | MamK                                     | 39 kDa           | 0                               | 31                  | 27   | 25   | 20   | -1.24                             | -1.35                |
| MGR4095   | MamM                                     | 34 kDa           | 3 / 6                           | 15                  | 12   | 14   | 17   | -1.07                             | 1.42                 |
| MGR4097   | MamO                                     | 65 kDa           | 8 / 10                          | 34                  | 37   | 36   | 34   | 1.06                              | -1.09                |
| MGR4099   | MamA                                     | 24 kDa           | 0                               | 26                  | 26   | 23   | 27   | -1.13                             | 1.04                 |
| MGR4100   | MamQ                                     | 30 kDa           | 1                               | 16                  | 16   | 16   | 15   | 1.00                              | -1.07                |
| MGR4101   | MamR                                     | 8 kDa            | 0                               | 23                  | 20   | 23   | 22   | 1.00                              | 1.10                 |
| MGR4102   | MamB                                     | 32 kDa           | 3 / 4                           | 12                  | 13   | 11   | 14   | -1.09                             | 1.08                 |
| MGR4103   | MamS                                     | 19 kDa           | 1 / 2                           | 16                  | 19   | 14   | 17   | -1.14                             | -1.12                |
| MGR4104   | MamT                                     | 19 kDa           | 1                               | 15                  | 13   | 14   | 15   | -1.07                             | 1.15                 |
| MGR4109   | HlyB (Type I secretion system<br>ATPase) | 81 kDa           | 5 / 6                           | n.d.                | n.d. | 11   | 11   | unique                            | unique               |
| MGR4115   | hypothetical protein                     | 12 kDa           | 0                               | n.d.                | 13   | 13   | n.d. | unique                            | unique (WT)          |
| MGR4147   | ftsZ like protein                        | 34 kDa           | 0                               | 12                  | 11   | 13   | 13   | 1.08                              | 1.18                 |
| MGR4150   | MamY                                     | 41 kDa           | 1 / 2                           | 17                  | 16   | 17   | 14   | 1.00                              | -1.14                |
| MGR4191   | Adenine phosphoribosyltransferase        | 20 kDa           | 0                               | 10                  | 12   | 10   | 11   | 1.00                              | -1.09                |

1 TABLE S5. Putative Fur-box sequences identified by similarity to predicted Fur-box  
 2 sequences of *M. magneticum* (1) and their relative position to the startcodon of differentially  
 3 expressed genes in the *fur* mutant.

| Locus tag       | Protein identification / function                     | Putative Fur-box sequence   |
|-----------------|-------------------------------------------------------|-----------------------------|
| <b>MGR0081</b>  | <b>TonB-dependent outer membrane receptor</b>         | <b>GTTGAGAGTGCAGCGCATT</b>  |
| <b>MGR0236</b>  | <b>bacterial extracellular solute-binding protein</b> | <b>CATGCAAATCACTCGCATA</b>  |
| MGR0237         | PAS:GGDEF                                             | AAAGCGAGCTTCCCCTGG          |
| MGR0662         | hypothetical protein                                  | AAAGCGAGCTTCCCCTGG          |
| MGR0705         | conserved hypothetical protein                        | TTTGATAGTGATTTGCGTT         |
| MGR0706         | conserved hypothetical protein                        | TTTGATAGTGATTTGCGTT         |
| MGR0707         | conserved hypothetical protein                        | TTTGATAGTGATTTGCGTT         |
| MGR1021         | periplasmic trypsin-like serine protease              | -                           |
| <b>MGR1446</b>  | <b>Feo B2</b>                                         | <b>GGTGATAACCAATCGCGAC</b>  |
| <b>MGR1447</b>  | <b>Feo A2</b>                                         | <b>GGTGATAACCAATCGCGAC</b>  |
| MGR1593         | transcriptional regulator ArsR family                 | GATGGCAAGGGGTTTTTAT         |
| MGR4109         | HlyB type I secretion system ATPase                   | TTTGACGCGTGTATGCATC         |
| MGR0698         | CydA cytochrome d ubiquinol oxidase subunit 1         | GGTGCGGGGCAGTCGCCAG         |
| <b>ABL14106</b> | <b>Feo B1</b>                                         | <b>ATCGCAACTCATTTCGCAAT</b> |

4 <sup>a</sup> Proteins with putative relation to iron metabolism are shown in bold.

5

5 Figure S1. Confirmation of *fur* deletion by Southern blot analysis of NcoI-digested WT  
6 (lane 1) and putative *fur* mutant (lane 2-7) genomic DNA. The blot was hybridized with a  
7 probe overlapping the NcoI restriction site. Digestion of WT should result in a 208 bp band  
8 and a 1362 bp fragment, whereas digestion of genomic DNA from *fur*<sup>-</sup> clones should result in  
9 a fragment of 208 bp. Lane M, molecular weight marker.

10

11 Figure S2. Similarity tree of  $\alpha$ -proteobacterial and *E. coli* Fur-like proteins. Sequences are  
12 designated by locus tag accession numbers. Fur-like proteins of MTB are shown in bold.  
13 Proteins that have been characterized experimentally are underlined. MgFur is boxed.

14

15 Figure S3. Intracellular iron content of WT, RU-1 and RU-1 transcomplemented with  
16 pBBR1MCS-2*fur* grown in FSM under microaerobic conditions. Values are given as means  $\pm$   
17 SD of three independent replicates.

18

19 Figure S4. Growth yield of WT and RU-1 after 24 h growth at 30 °C at different  
20 concentrations of iron (A), manganese (B), and) paraquat (C). Values are given as means  $\pm$   
21 SD of three independent replicates.

22

23 Figure S5. Whole-cell transmission Mössbauer spectra of (A) WT, (B) RU-1 +Fe and (C)  
24 RU-1 -Fe. Precultures of (A) and (B) were grown in iron replete media. Precultures of (C)  
25 were kept in low iron media. Subspectrum 1 corresponds to a ferritin-like component  
26 characterized by a temperature-dependent doublet exhibiting an unusually low isomer shift  
27 for an oxo mineral; species 2 shows an isomer shift and quadrupole splitting typical for high  
28 spin ferrous iron in an octahedral oxygen ligand sphere. Subspectra (3) and (4) represent two  
29 magnetically split sextets attributed to magnetite A and magnetite B, respectively.

30

31 Figure S6. FURTA assay with *E. coli* H1717 carrying (1) pGEM, (2) pGEMPfhuF, (3)  
32 pGEMPmgr4079, (4) pGEMPrplK, (5) pGEMPmms16, (6) pGEMPmamDC and (7)  
33 pGEMPmamAB streaked on (A) iron-depleted MacConkey (100  $\mu$ M 2,2-dipyridyl) and (B)  
34 iron-replete MacConkey (30  $\mu$ M FeCl<sub>3</sub>)

35

36 Figure S7. Coomassie silver blue stained 2D-gels of soluble protein fractions obtained from  
37 A) WT and B) RU-1 after growth under iron-deplete conditions

38

39 Figure S8. Putative Fur-box consensus sequence of *M. gryphiswaldense* Fur regulated genes  
40 *feoAB1*, *feoAB2*, *mgr0081* and *mgr0236* derived from homology search with Fur-box  
41 sequences of *M. magneticum* (1).

42

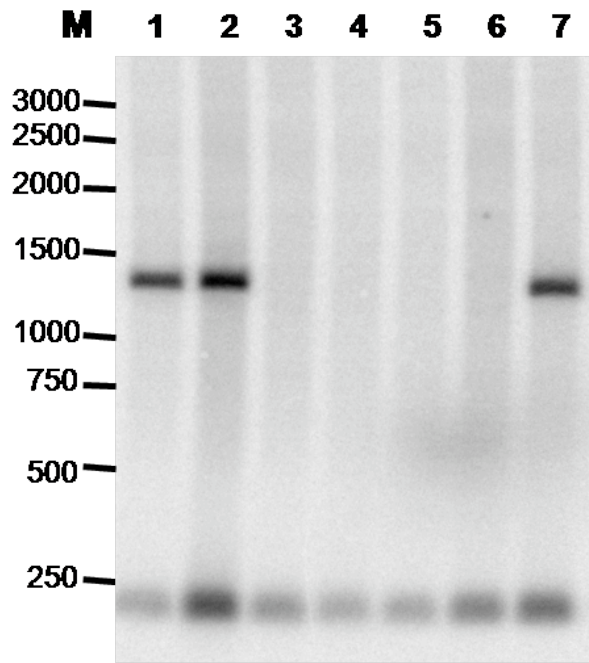

42

43 Figure S1.



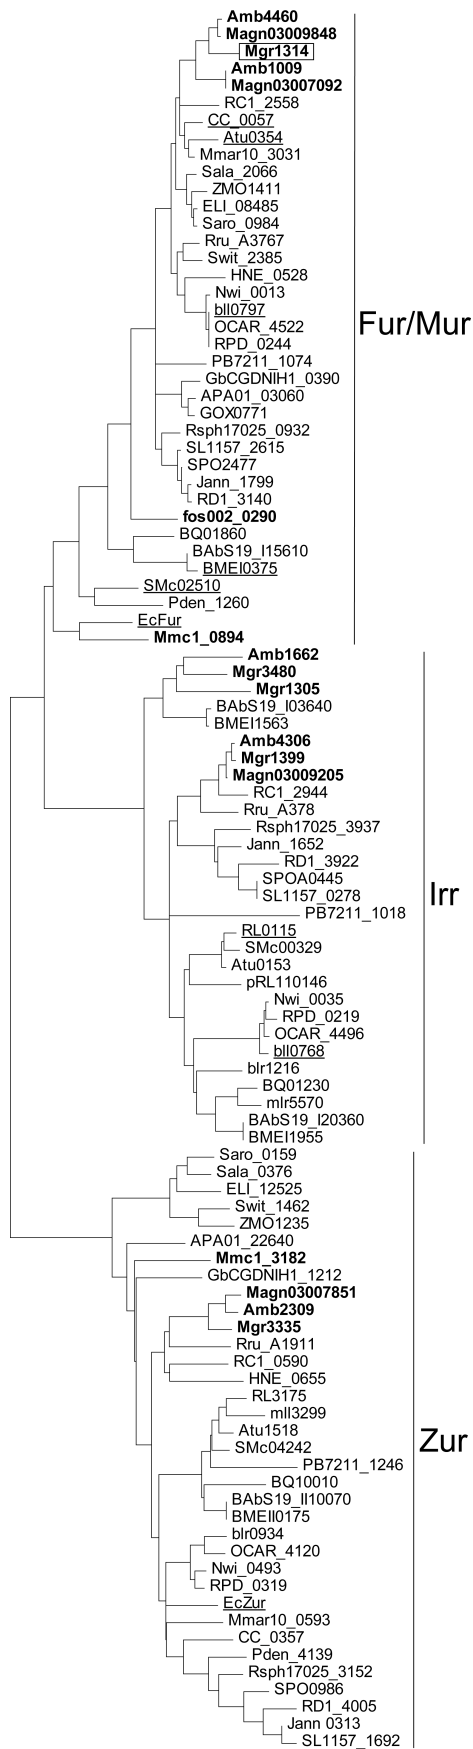

44

0.2

45 Figure S2.

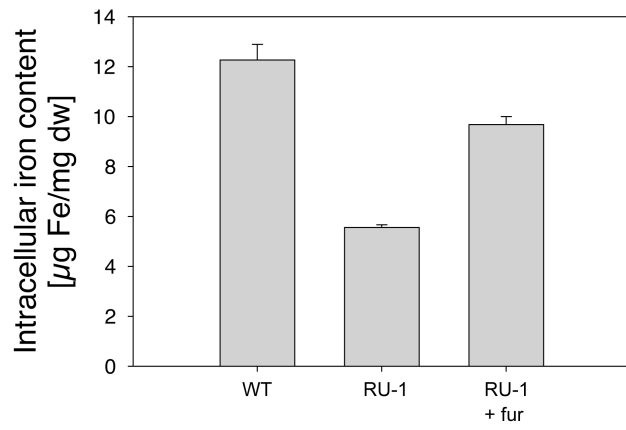

46

47 Figure S3.

48

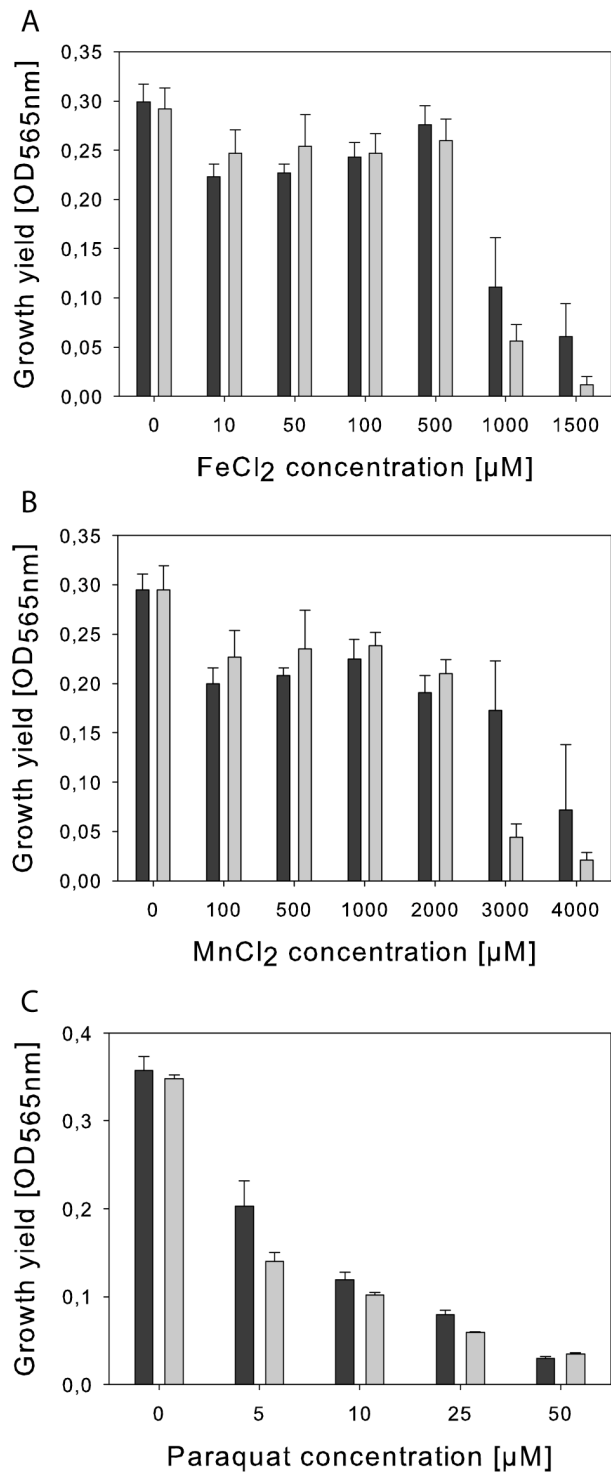

48

49 Figure S4.

50

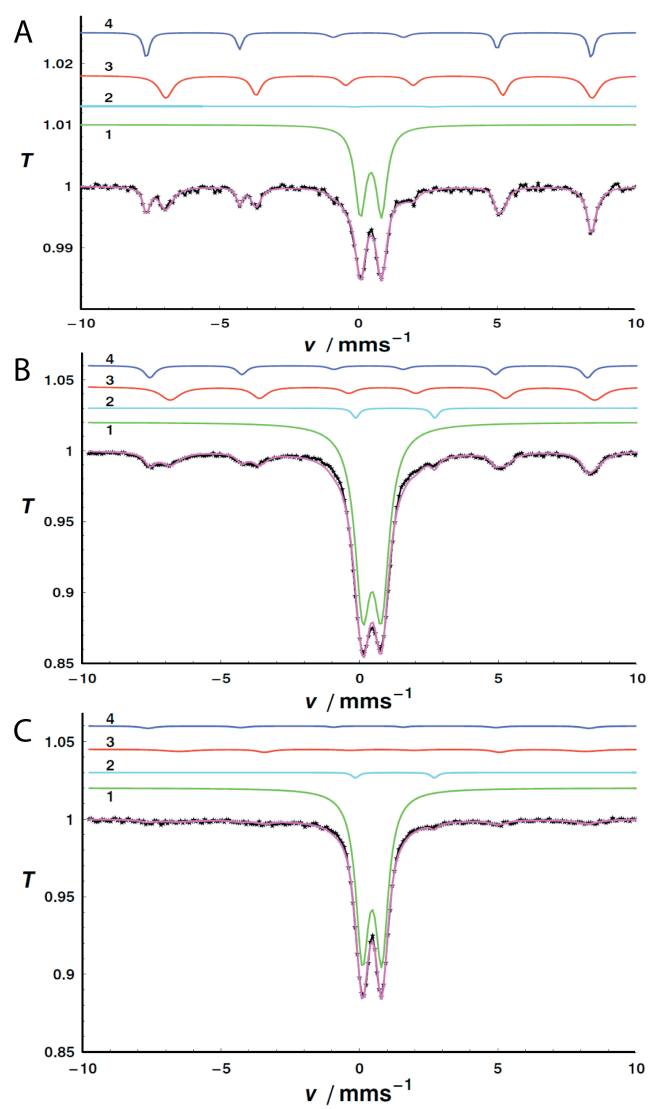

50

51 Figure S5.

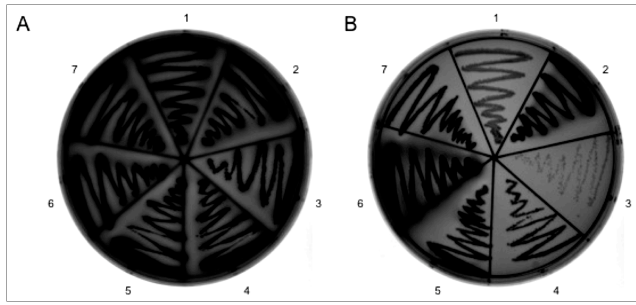

52

53 Figure S6.

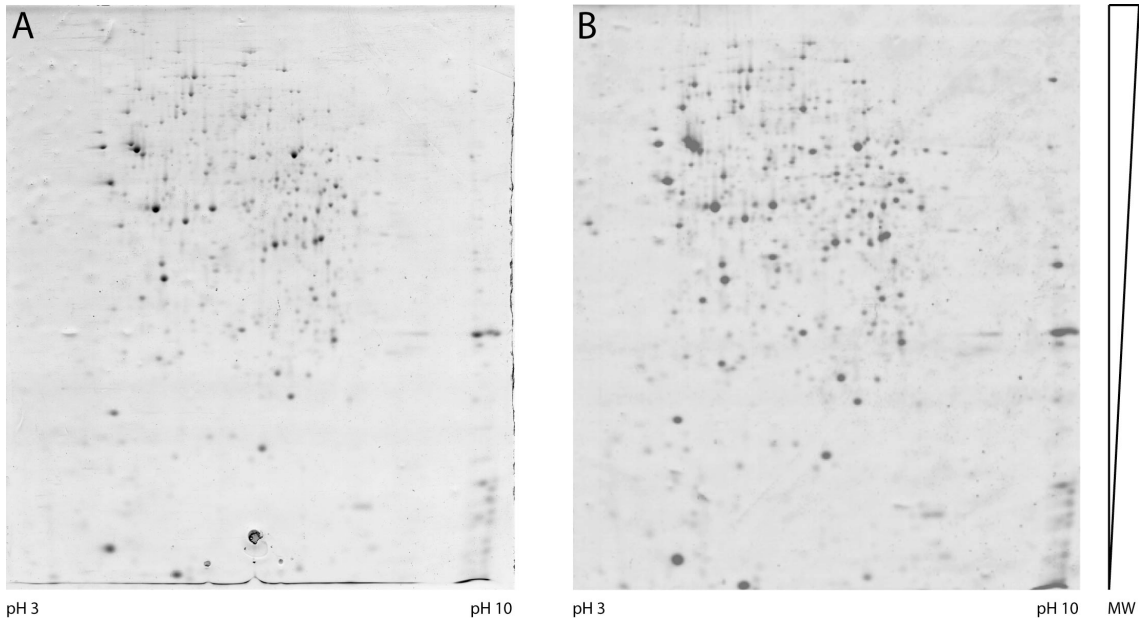

54

55 Figure S7.

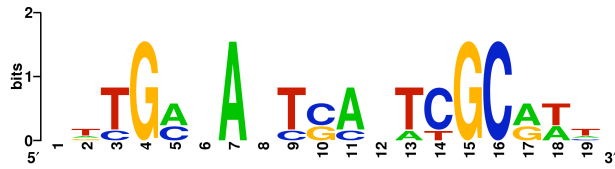

56

57 Figure S8.

58

58 References

59

- 60 1. **Rodionov, D., M. Gelfand, J. Todd, A. Curson, and A. Johnston.** 2006.  
61 Computational Reconstruction of Iron- and Manganese-Responsive Transcriptional  
62 Networks in  $\alpha$ -Proteobacteria. PLoS Comput. Biol. **2**:1568-1585.

63

64
